# Supplementary material for: Correlation Between Various Insulin Resistance Indices and Sarcopenia: Evidence from CHARLS
Source: Research Square preprint supplement (doi:10.21203/rs.3.rs-8404542/v1), 2026-01-16
Supplement: Supplementary file 2 [file b6329ba198ae22d45a9a7e15.docx]

Supplementary Table 2.

(A).


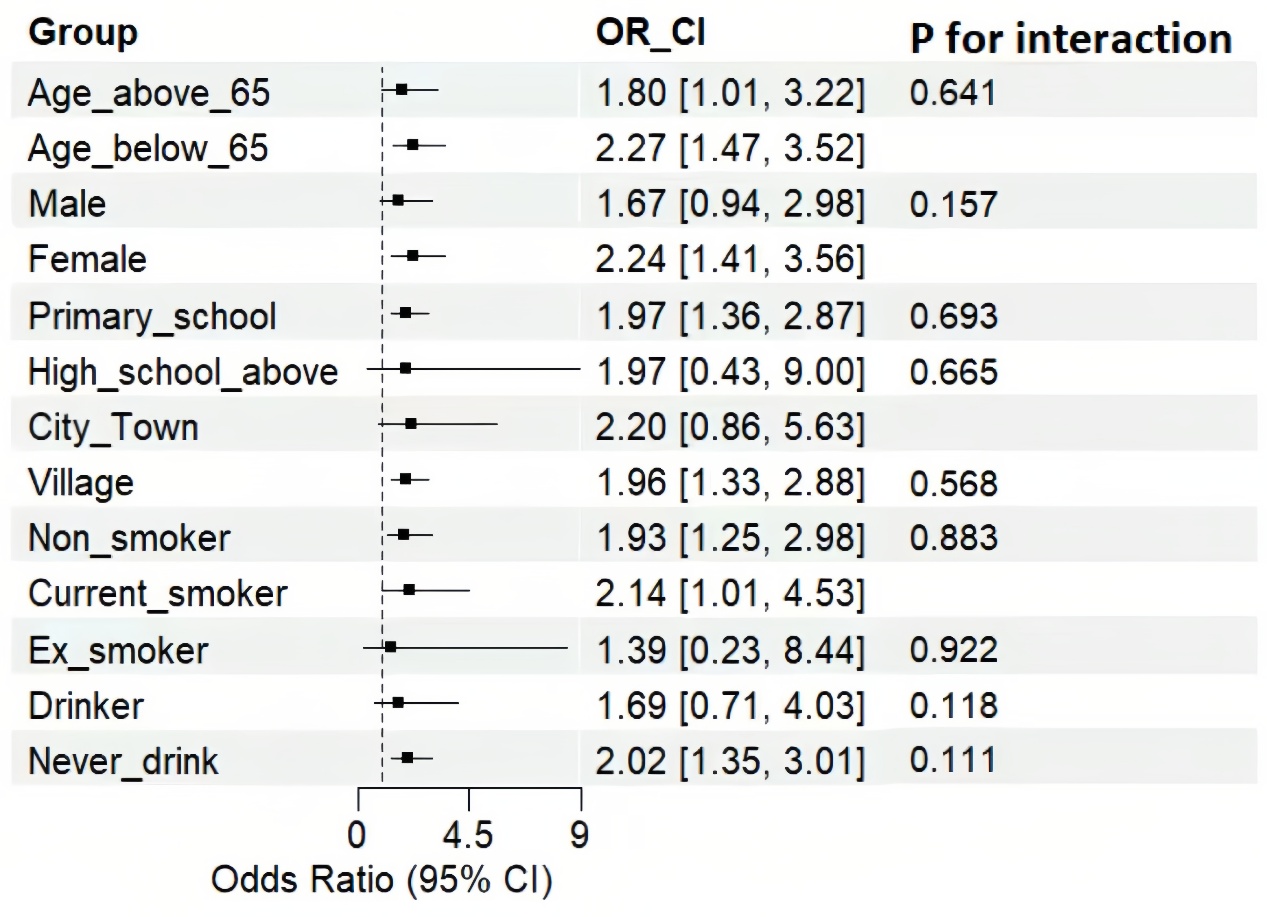


(B).
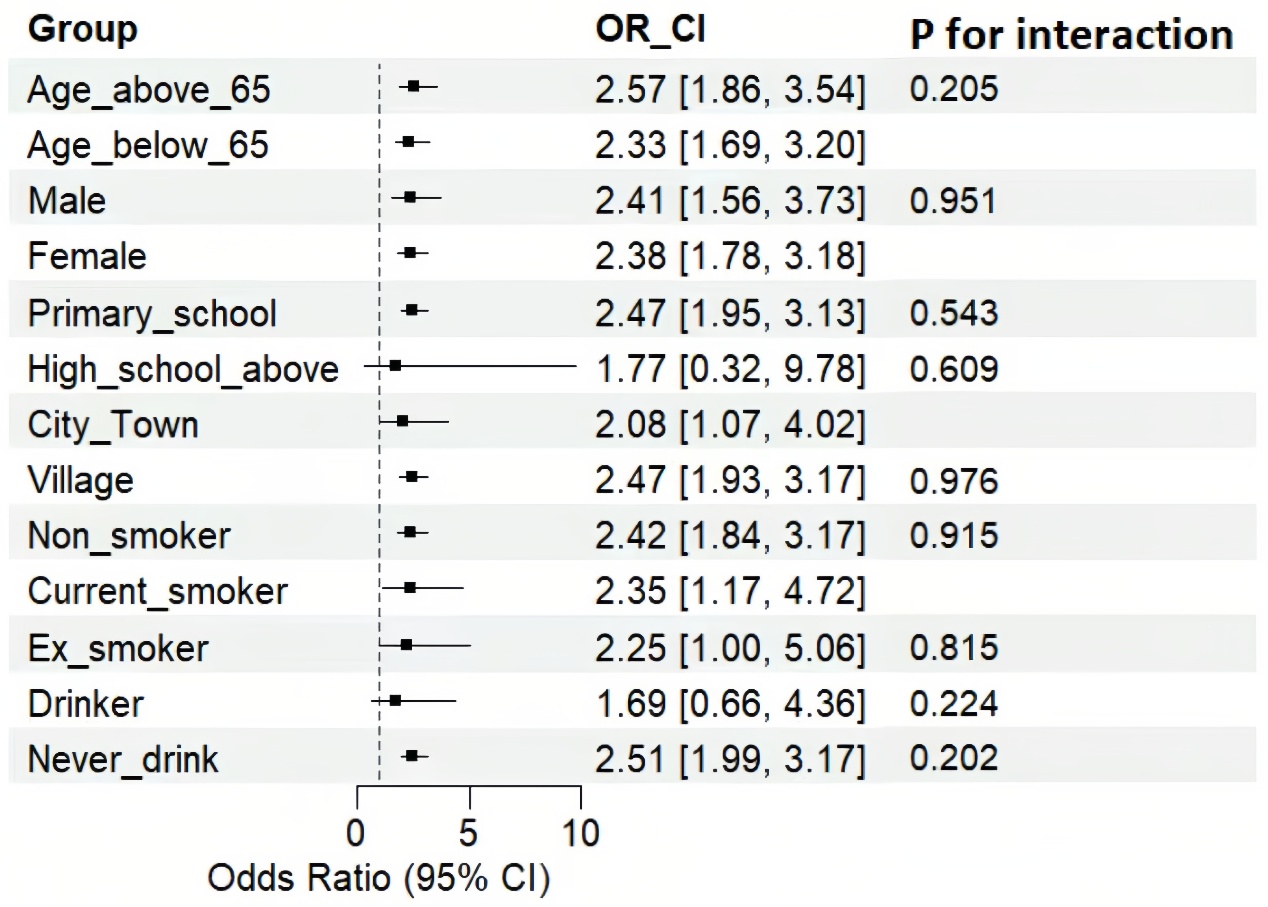


(C).


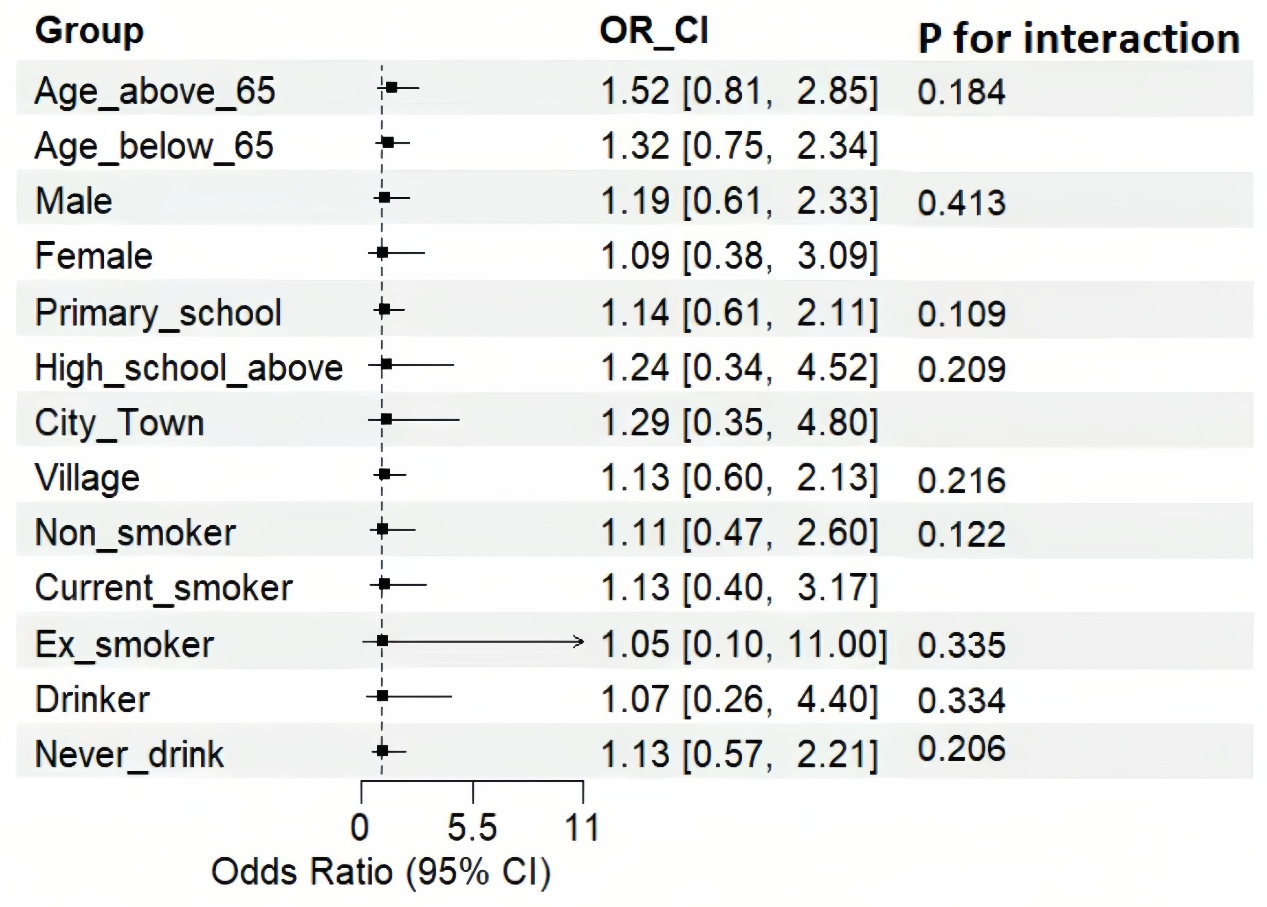


Subgroup analysis. Forest maps of the association between seven alternative IR indices and the risk of incident SA by age, sex, location, education, smoking, and drinking. Odds ratios were adjusted for age, sex, location, education, smoking, drinking, WBC, CRP, HCT, MCV, PLT, TC and LDL. OR, odds ratio; 95%CI, 95% confidence interval; **(A)** CVAI, **(B)** TG/HDL, **(C)** TyG.
